# Supplementary material for: TRIBE editing reveals specific mRNA targets of eIF4E-BP in Drosophila and in mammals
Source: PubMed Central journal article supplement — Sci Adv. 2020 Aug 12;6(33):eabb8771. doi: 10.1126/sciadv.abb8771 (PMC7423359; doi:10.1126/sciadv.abb8771), 2020-08-12
Supplement: abb8771_Table_S3.pdf [file abb8771_Table_S3.pdf]

One hundred forty-four genes are detected as thor targets in thor Hyper-TRIBE and also the translational efficiency of them are decreased after treatment of mTOR inhibitor.

(Thor Hyper-TRIBE: Rapa\_common + Torin\_common

Ribosome profiling: TE<0.8, p<0.1)

**Ribosome proteins (39) :**

RPL5, RPL7, RPL7-LIKE, RPL9, RPL10, RPL10AB, RPL15, RPL18A, RPL23A, RPL24-LIKE, RPL26, RPL27, RPL28, RPL29, RPL31, RPL32, RPL35, RPL36A, RPL37A, RPL38, RPL41, RPLP0, RPLP1, RPLP2, RPS11, RPS13, RPS14B, RPS15AB, RPS16, RPS18, RPS26, RPS27, RPS27A, RPS28B, RPS29, RPS3A, RPS6, RPS7, mRPS9

**Translational initiation factors (11)**

eIF3b (eIF3-S9), eIF3d1 (eIF-3p66), eIF3e (Int6), eIF3g1 (CG8636), eIF3h, eIF3i (Trip1), eIF3j, eIF3k (CG10306), eIF3l (CG5642), eIF3m (Tango7)

eIF-2alpha

**Other translation related proteins (7)**

EEF1DELTA, EF1ALPHA48D, EF1GAMMA, ERF1, EIF-5A, AATS-TYR, NOP5(rRNA modification)

**The proteins with other and unknown functions (67+20)**

|            |           |         |
|------------|-----------|---------|
| ZFRP8      | PIX       | DROJ2   |
| TCTP       | PCMT      | COVB    |
| SRP54K     | PCH2      | COOP    |
| SRP19      | NLP       | CG9836  |
| SLMO       | NAP1      | CG9350  |
| SHRB       | Mpcp2     | CG9330  |
| SESB       | MGR       | CG8386  |
| SAM-S      | MDH1      | CG8353  |
| RPII33     | LSM7      | CG8258  |
| RPB10      | LOST      | CG7789  |
| RPA-70     | L(3)01239 | CG7265  |
| RM62       | KARYBETA3 | CG6686  |
| RHEB       | JHI-26    | CG6523  |
| REG        | IPK2      | CG6388  |
| RCD5       | HSC70-5   | CG6353  |
| RACK1      | GAPDH1    | CG6195  |
| RAB1       | FDH       | CG5854  |
| PROSALPHA7 | ENDOGI    | CG5355  |
| PROSALPHA5 | EFF       | CG44014 |
| POLO       | EDL       | CG34179 |

CG34164  
CG32267  
CG31548  
CG31436  
CG30273  
CG18343  
CG16985  
CG16817  
CG15735

CG1550  
CG15083  
CG13630  
CG13319  
CG1236  
CG12173  
CG11752  
CG11454  
CG10565

CCHL  
BEAF-32  
BALL  
ATPSYN-B  
ARPC2  
ARF79F  
AOS1  
ANT2  
ADK2
